# Supplementary material for: Metacognitive Exam Preparation Assignments in an Introductory Biology Course Improve Exam Scores for Lower ACT Students Compared with Assignments that Focus on Terms
Source: Atypon-hosted journal article supplement (doi:10.1187/cbe.22-10-0212), 2024-01-12
Supplement: combinedsupmats.pdf [file combinedsupmats.pdf]

# Supplemental Material

*CBE—Life Sciences Education*

Angell *et al.*

## Supplemental Material

### Metacognitive Exam Preparation Assignments in an Introductory Biology Course Improve Exam Scores for Lower Achieving Students Compared to Assignments that Focus on Terms

Diane K. Angell,<sup>1</sup> Sharon Lane-Getaz,<sup>2</sup> Taylor Okonek,<sup>3</sup> Stephanie Smith,<sup>4</sup>

<sup>1</sup>Department of Biology, St. Olaf College, Northfield MN, 55057; <sup>2</sup>Department of Mathematics Statistics and Computer Science, St. Olaf College, Northfield MN, 55057; <sup>3</sup>Department of Biostatistics University of Washington, Seattle, WA 98105; <sup>4</sup>St. Olaf College, Northfield MN, 55057

Current Address: Stephanie Smith<sup>5</sup>

<sup>5</sup>University of Chicago Booth School of Business, Chicago, IL 60637

#### Supplemental materials include:

*Table S1. Sample metacognitive assignments.*

*Table S2. Representative terms students were asked to define for terms assignment.*

*Table S3. Enrollment and participation by student gender/sex.\**

*Table S4. Sample sizes for students in both assignment groups.*

*Table S5. Model selection determining factors influencing exam scores.*

*Table S6. Model selection determining factors influencing predicted scores.*

*Table S7. Model selection determining factors influencing accuracy.*

*Table S8. Linear model results of best-fit model for score.*

*Table S9. Best-fit linear model results of predicted score.*

*Table S10. Best-fit linear model results of accuracy.*

*Table S1. Sample metacognitive assignments.*

#### I. Sample Metacognitive Assignments for Exams

##### A. First Exam

What strategies do you use to study for exams or quizzes? (study with friends, on your own, read the text, test yourself by doing the end of chapter questions, read notes, highlight notes, summarize text in your own words, type notes up, talk to yourself, make flashcards, going somewhere super quiet, going somewhere with just the right amount of distraction etc...). IN other words, tell me what has worked for you in the past!

Do you think you have spent time strategizing about your learning before? Give an example.

How do you think you will study for this exam?

Is there material from lecture or material that was presented during class that you feel like you did not understand?

Why do you think you had trouble with this topic/these topics?

What do you think were the two MOST difficult (hard to read/ hard to understand) or conceptually

challenging topics of the textbook reading (list below)?  
(Look through the chapters!)

a. \_\_\_\_\_

Why do you think you had trouble understanding this concept?

b. \_\_\_\_\_

How do you think you will work to understand this concept?

How long do you expect to study for this exam? (I know it is hard to estimate but try!) (Don't include time spent simply reading the chapters.)

What grade do you think you will get? \_\_\_\_\_% (YOU WILL NOT GET CREDIT UNLESS YOU VENTURE A GUESS!!! Please do not write in a letter grade, share the actual %)

### **B. Second Exam**

First pull out your 1st exam. What grade did you get?

Did you do as well as you thought you would?

What kinds of questions did you lose points on (factual questions or conceptual questions/Short or long questions?)

Why did you lose those points? Careless mistakes? Did you simply not know what the answer was? Did you not understand the question? Did you not give enough detail? Not use terms where you could have?

Do you wish you had studied differently? Did your study strategies work for you?

Did lab help you understand the material from the text or lecture?

Name one thing you will do differently to study for this exam that you did not do for the last exam? (be creative-what works for you!)

Do you think flashcards would be a useful way to study this material? Why/Why not?

What do you think were the **three** most difficult topics of the **textbook** reading? (Flip through the chapters)

a. The **FIRST** Topic/concept I found difficult was.....

This topic was difficult because....(too many terms, too much detail, fundamentally don't understand, too hard, wasn't explained well in the text)

b. The **SECOND** Topic/concept I found difficult was.....

This topic was difficult because....(too many terms, too much detail, fundamentally don't understand, too hard)

c. The **THIRD** Topic/concept I found difficult was.....

This topic was difficult because....(too many terms, too much detail, fundamentally don't

understand, too hard)

How long do you expect to study for this exam? (I know it is hard to estimate but try!)

How will you start studying? What will you begin with?

What grade do you think you will get? \_\_\_\_\_% (YOU WILL NOT GET CREDIT UNLESS YOU VENTURE A GUESS and share as a %!!!)

### C. Third Exam

Think back to your second exam (you might actually get it out-there might be things you could review on it). Did you do as well as you thought you would?

Why did you lose those points? Careless mistakes? Did you simply not know what the answer was? Did you not understand the question or not read it carefully? Did you not give enough detail? Not use terms where you could have?

Have your study strategies changed across the semester?

This **class** has had material that is both very detailed alongside "big picture" themes and concepts. How have you managed learning both of these ends of the spectrum?

Do you think you are better at learning the details or big picture concepts?

Name one thing you will do differently to study for this exam that you did not do for the last exam? (be creative-what might work for you!)

How do you think this material is different to study for than a language class or math class? (or some other class) Why?

What parts of the material for the final exam do you feel like you already know a little or feel comfortable with?

What do you think are the **two** areas you most need to study (remember there are cumulative questions on the final)?

- a. The FIRST area or bunch of material I need to study is.....
- b. The SECOND area I need to study is.....

How long do you expect to study for this exam? (I know it is hard to estimate but try!) You might also think about what it means to "study" I had a huge range of responses when I asked this last time!

How will you start studying? What will you begin with?

What grade do you think you will get? \_\_\_\_\_% (YOU WILL NOT GET CREDIT UNLESS YOU VENTURE A GUESS!!!)

*Table S2. Representative terms students were asked to define for terms assignment.*

Note: Students asked to define terms were also asked the following at the end of their assignment.

What grade do you think you will get? \_\_\_\_\_% (YOU WILL NOT GET CREDIT UNLESS YOU VENTURE A GUESS!!!)

(6-8 terms were randomly chosen from the lists below)

|                      |                      |                      |
|----------------------|----------------------|----------------------|
| 1 <sup>st</sup> exam | 2 <sup>nd</sup> exam | 3 <sup>rd</sup> Exam |
|----------------------|----------------------|----------------------|

|                        |                                     |                        |
|------------------------|-------------------------------------|------------------------|
| Gene flow              | Endosymbiosis                       | Protostome             |
| Sympatric speciation   | Eukaryotes                          | Deuterostome           |
| Allopatric speciation  | Prokaryotes                         | Hemipteran             |
| Heterozygote advantage | Bacteria                            | Mollusks               |
| Convergent evolution   | Archaea                             | Cephalopod             |
| Homoplasly             | Meiosis                             | Echinoderms            |
| Homologous             | Mitosis                             | Annelids               |
| Analogous              | Gametes                             | Chordates              |
| Vestigial trait        | Zygote                              | Vertebrates            |
| Directional selection  | Alternation of generation           | Endothermy             |
| Stabilizing selection  | Gametophyte                         | Metamorphosis          |
| Genetic drift          | Angiosperms                         | Water vascular system  |
| Hybrid zone            | Gymnosperms                         | Pharyngeal gills slits |
| Species concepts       | Bryophytes                          | Oviparous              |
| Founder event          | Chitin                              | Viviparous             |
| Genetic bottleneck     | Zygomycete                          | Notochord              |
| Gene pool              | Basidiomycete                       | Tube feet              |
| Adaptive radiation     | Ascomycete                          | Amniotes               |
| Synapomorphy           | Spores                              | Notochord              |
| Polyploidy             | Vascular system                     | Placenta               |
|                        | Autotrophic                         | Radula                 |
|                        | Hyphae                              | Ganglia                |
|                        | Mycelium                            | Hydrostatic skeleton   |
|                        | Fruits                              |                        |
|                        | Seeds                               |                        |
|                        | Multinucleate                       |                        |
|                        | Lateral or horizontal gene transfer |                        |

*Table S3. Enrollment and participation by student gender/sex.\**

|                                                                | Female | Male  | Total |
|----------------------------------------------------------------|--------|-------|-------|
| Number of students in five sections                            | 182    | 129   | 311   |
| Number enrolling in study and completing all three assignments | 137    | 96    | 233   |
| Percent completing all three assignments                       | 75.3%  | 74.4% | 74.9% |

\*The information on the number of students was obtained from institutional data so gender/sex was recorded as binary. Information on race/ethnicity was not readily available.

*Table S4. Sample sizes for students in both assignment groups.*

| Assignment | Higher ACT<br>(at or above the median) |       | Lower ACT<br>(below the median) |       |
|------------|----------------------------------------|-------|---------------------------------|-------|
|            | Metacognitive                          | Terms | Metacognitive                   | Terms |
| Junior     | 3                                      | 1     | 3                               | 0     |
| Sophomore  | 35                                     | 38    | 24                              | 23    |

|               |     |    |    |    |
|---------------|-----|----|----|----|
| First Year    | 36  | 35 | 15 | 15 |
| Not Indicated | 2   | 1  | 1  | 1  |
| Subtotal      | 76  | 75 | 43 | 39 |
| Total         | 151 |    | 82 |    |

Table S5. Model selection determining factors influencing exam scores.

| Df       | AIC           | Current model-<br>Best model | Model                                                                                               |
|----------|---------------|------------------------------|-----------------------------------------------------------------------------------------------------|
| <b>8</b> | <b>4904.6</b> | <b>0</b>                     | <b>Score ~ Achievement + Exam + Assignment + Achievement*Assignment+(1 StudID) + (1 Instructor)</b> |
| 7        | 4907.4        | 2.8                          | Score ~ Achievement + Exam + Assignment +Achievement*Assignment + (1 StudID)                        |
| 7        | 4912.1        | 7.5                          | Score ~ Achievement +Exam + Assignment + (1 StudID) + (1 Instructor)                                |
| 7        | 4918.9        | 14.3                         | Score ~ Achievement + Assignment +Achievement*Assignment + (1 StudID) + (1 Instructor)              |
| 7        | 5093.4        | 188.8                        | Score ~ Achievement + Exam + Assignment + Achievement*Assignment + (1 Instructor)                   |
| 6        | 5113.0        | 208.4                        | Score ~ Achievement + Exam + Assignment+ Achievement*Assignment                                     |

Table S6. Model selection determining factors influencing predicted scores.

| Df       | AIC           | Current model-<br>Best model | Model                                                                                                        |
|----------|---------------|------------------------------|--------------------------------------------------------------------------------------------------------------|
| <b>8</b> | <b>4232.0</b> | <b>0</b>                     | <b>PredictedScore ~ Achievement + Exam + Assignment + Achievement*Assignment+(1 StudID) + (1 Instructor)</b> |
| 7        | 4233.5        | 1.5                          | PredictedScore ~ Achievement + Exam + Assignment +Achievement*Assignment + (1 StudID)                        |
| 7        | 4235.6        | 3.6                          | PredictedScore ~ Achievement +Exam + Assignment + (1 StudID) + (1 Instructor)                                |
| 7        | 4325.1        | 93.1                         | PredictedScore ~ Achievement + Assignment +Achievement*Assignment (1 StudID) + (1 Instructor)                |
| 7        | 4423.6        | 191.6                        | PredictedScore ~ Achievement + Exam + Assignment + Achievement*Assignment + (1 Instructor)                   |
| 6        | 4434.2        | 202.2                        | PredictedScore ~ Achievement + Exam + Assignment+ Achievement*Assignment                                     |

Table S7. Model selection determining factors influencing accuracy.

| Df       | AIC           | Current model-<br>Best model | Model                                                                                           |
|----------|---------------|------------------------------|-------------------------------------------------------------------------------------------------|
| <b>7</b> | <b>4972.3</b> | <b>0</b>                     | <b>Accuracy ~ Achievement + Exam + Assignment +Achievement*Assignment + (1 StudID)</b>          |
| 8        | 4974.0        | 1.7                          | Accuracy ~ Achievement + Exam + Assignment + Achievement*Assignment+(1 StudID) + (1 Instructor) |
| 7        | 4982.7        | 10.4                         | Accuracy ~ Achievement +Exam + Assignment + (1 StudID)                                          |

|   |        |      |                                                                                      |
|---|--------|------|--------------------------------------------------------------------------------------|
| 7 | 5012.5 | 40.2 | Accuracy ~ Achievement + Assignment + Achievement*Assignment + (1 StudID)            |
| 7 | 5015.8 | 43.5 | Accuracy ~ Achievement + Exam + Assignment + Achievement*Assignment + (1 Instructor) |
| 6 | 5021.6 | 49.3 | Accuracy ~ Achievement + Exam + Assignment + Achievement*Assignment                  |

Table S8. Linear model results of best-fit model for score.

Score ~ Achievement + Exam + Assignment + Achievement \* Assignment + (1 | StudID) + (1 | Course)

| Fixed Effects                 | Estimates | St. Er.     | t value | Pr(> t ) |            |
|-------------------------------|-----------|-------------|---------|----------|------------|
| (Intercept)                   | 84.0337   | 1.3901      | 60.450  | 4.40e-08 | ***        |
| Achievement                   | -9.0169   | 1.5221      | -5.924  | 1.15e-08 | ***        |
| Exam 2                        | -0.5740   | 0.5788      | -0.992  | 0.3218   |            |
| Exam 3                        | 1.0576    | 0.5788      | 1.827   | 0.0683   |            |
| Assignment                    | -0.5134   | 1.2541      | -0.409  | 0.6826   |            |
| Achievement:Assignment        | 5.3107    | 2.1176      | 2.508   | 0.0128   | *          |
| Random Effects:               | Variance  | Std. Dev.   |         |          |            |
| StudID(Intercept)             | 46.32     | 6.806       |         |          |            |
| Instructor (Intercept)        | 2.97      | 1.723       |         |          |            |
|                               |           |             |         |          |            |
| N StudID                      | 233       |             |         |          |            |
| N Instructor                  | 3         |             |         |          |            |
| N Observations                | 699       |             |         |          |            |
| Correlation of Fixed Effects: |           |             |         |          |            |
|                               | (Intr)    | Achievement | Exam 2  | Exam 3   | Assignment |
| Achievement                   | -0.369    |             |         |          |            |
| Exam 2                        | -0.208    | 0.000       |         |          |            |
| Exam 3                        | -0.208    | 0.000       | 0.500   |          |            |
| Assignment                    | -0.451    | 0.415       | 0.000   | 0.000    |            |
| Achievement:Assignment        | 0.267     | -0.716      | 0.000   | 0.000    | -0.593     |

Table S9. Best-fit linear model results of predicted score.

PredictedScore ~ Achievement + Exam + Assignment + Achievement \* Assignment + (1 | StudID) + (1 | Course)

| Fixed Effects          | Estimates | St. Er. | t value | Pr(> t ) |     |
|------------------------|-----------|---------|---------|----------|-----|
| (Intercept)            | 89.40245  | 0.80771 | 110.687 | 1.64e-10 | *** |
| Achievement            | -2.96099  | 0.94048 | -3.148  | 0.00186  | **  |
| Exam 2                 | -3.05150  | 0.35570 | -8.579  | < 2e-16  | *** |
| Exam 3                 | -3.17811  | 0.35570 | -8.935  | < 2e-16  | *** |
| Assignment             | -0.08076  | 0.77493 | -0.104  | 0.91709  |     |
| Achievement:Assignment | 1.52736   | 1.30838 | 1.167   | 0.24428  |     |

| <i>Random Effects:</i>        | <i>Variance</i> | <i>Std. Dev.</i> |        |        |            |
|-------------------------------|-----------------|------------------|--------|--------|------------|
| StudID(Intercept)             | 17.7405         | 4.2119           |        |        |            |
| Instructor (Intercept)        | 0.8815          | 0.9389           |        |        |            |
|                               |                 |                  |        |        |            |
| N StudID                      | 233             |                  |        |        |            |
| N Instructor                  | 3               |                  |        |        |            |
| N Observations                | 699             |                  |        |        |            |
| Correlation of Fixed Effects: |                 |                  |        |        |            |
|                               | (Intr)          | Achievement      | Exam 2 | Exam 3 | Assignment |
| Achievement                   | -0.393          |                  |        |        |            |
| Exam 2                        | -0.220          | 0.000            |        |        |            |
| Exam 3                        | 0.220           | 0.000            | 0.500  |        |            |
| Assignment                    | -0.480          | 0.415            | 0.000  |        |            |
| Achievement:Assignment        | 0.284           | -0.716           | 0.000  | 0.000  | -0.593     |

Table S10. Best-fit linear model results of accuracy.

Accuracy~ Achievement + Exam + Assignment+ Achievement\*Assignment +(1|StudID).

| <i>Fixed Effects</i>          | <i>Estimates</i> | <i>St. Er.</i>   | <i>t value</i> | <i>Pr(&gt; t )</i> |            |
|-------------------------------|------------------|------------------|----------------|--------------------|------------|
| (Intercept)                   | 5.1642           | 0.8258           | 6.253          | 1.10e-09           | ***        |
| Achievement                   | 6.0438           | 1.2349           | 4.894          | 1.86e-06           | ***        |
| Exam 2                        | -2.4775          | 0.6936           | -3.572         | 0.000391           | ***        |
| Exam 3                        | -4.2357          | 0.6936           | -6.107         | 2.15e-09           | ***        |
| Assignment                    | 0.3890           | 1.0181           | 0.382          | 0.702760           |            |
| Achievement:Assignment        | -3.6774          | 1.7174           | 2.141          | 0.033311           | *          |
| <i>Random Effects:</i>        | <i>Variance</i>  | <i>Std. Dev.</i> |                |                    |            |
| StudID(Intercept)             | 20.45            | 4.52             |                |                    |            |
|                               |                  |                  |                |                    |            |
| N StudID                      | 233              |                  |                |                    |            |
| N Observations                | 599              |                  |                |                    |            |
| Correlation of Fixed Effects: |                  |                  |                |                    |            |
|                               | (Intr)           | Achievement      | Exam 2         | Exam 3             | Assignment |
| Achievement                   | -0.512           |                  |                |                    |            |
| Exam 2                        | -0.420           | 0.000            |                |                    |            |
| Exam 3                        | -0.420           | 0.000            | 0.500          |                    |            |
| Assignment                    | -0.620           | 0.415            | 0.000          | 0.000              |            |
| Achievement:Assignment        | 0.368            | -0.719           | 0.000          | 0.000              | -0.593     |
